# Supplementary material for: Chemoenzymatic synthesis of para-nitrophenol (pNP)-tagged α2–8-sialosides and high-throughput substrate specificity studies of α2–8-sialidases
Source: Royal Society of Chemistry journal article supplement (doi:10.1039/c6ob02240e), 2016-11-24

# Supporting Information

for

## Chemoenzymatic synthesis of *para*-nitrophenol (*p*NP)-tagged $\alpha$ 2–8-sialosides and high-throughput substrate specificity studies of $\alpha$ 2–8-sialidases†

*Nova Tasnima,<sup>a</sup> Hai Yu,<sup>a</sup> Yanhong Li,<sup>a</sup> Abhishek Santra,<sup>a</sup> and Xi Chen<sup>\*a</sup>*

<sup>a</sup>Department of Chemistry, University of California, One Shields Avenue, Davis, California 95616, USA

\*Corresponding Author. Tel: +1 530 7546037; fax: +1 530 7528995. *E-mail address:* xiichen@ucdavis.edu

### Table of Contents

|                                                                                            |       |
|--------------------------------------------------------------------------------------------|-------|
| <sup>1</sup> H and <sup>13</sup> C NMR spectra for $\alpha$ 2–8-linked sialosides 1–7..... | S2–S8 |
|--------------------------------------------------------------------------------------------|-------|

$^1\text{H}$  and  $^{13}\text{C}$  NMR spectra of Neu5Ac $\alpha$ 2-8Neu5Ac $\alpha$ 2-3Gal $\beta$ pNP (1)

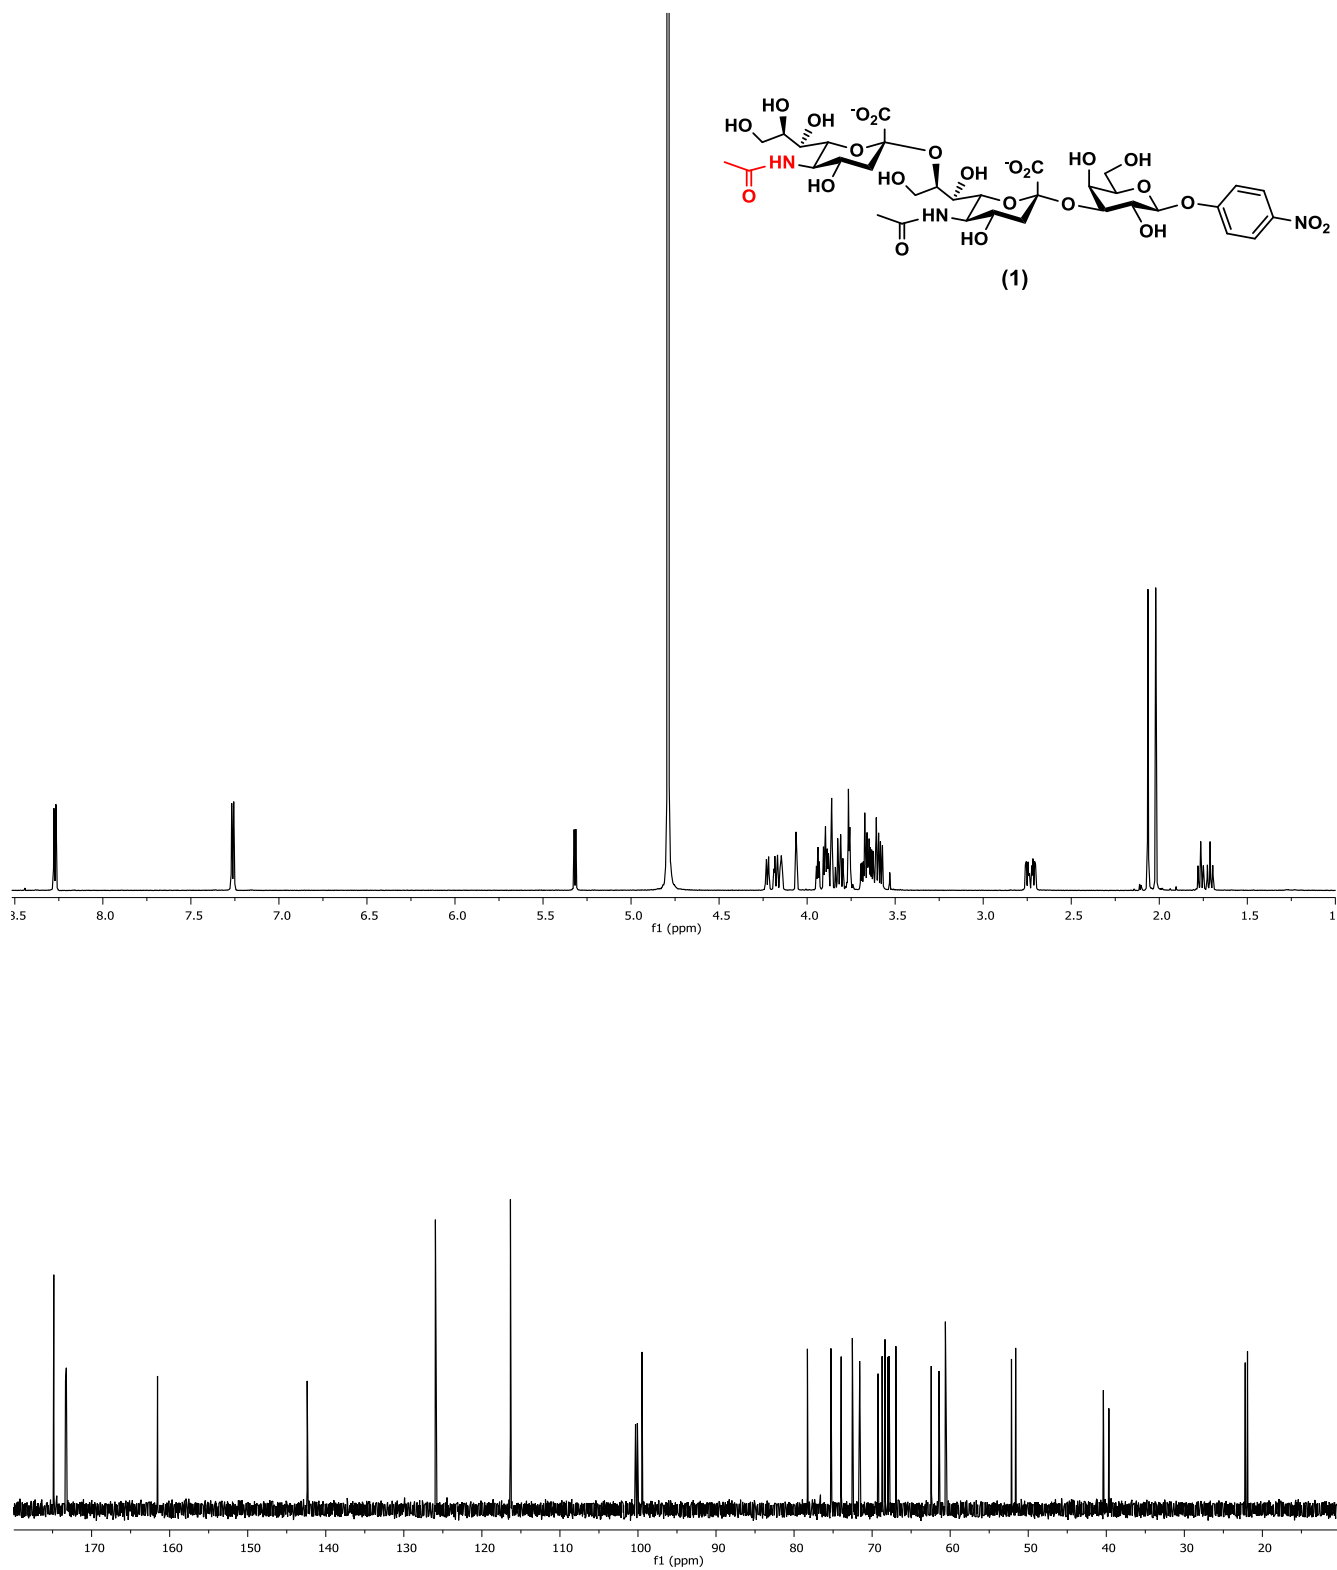

$^1\text{H}$  and  $^{13}\text{C}$  NMR spectra of Neu5G $\alpha$ 2-8Neu5A $\alpha$ 2-3Gal $\beta$ pNP (2)

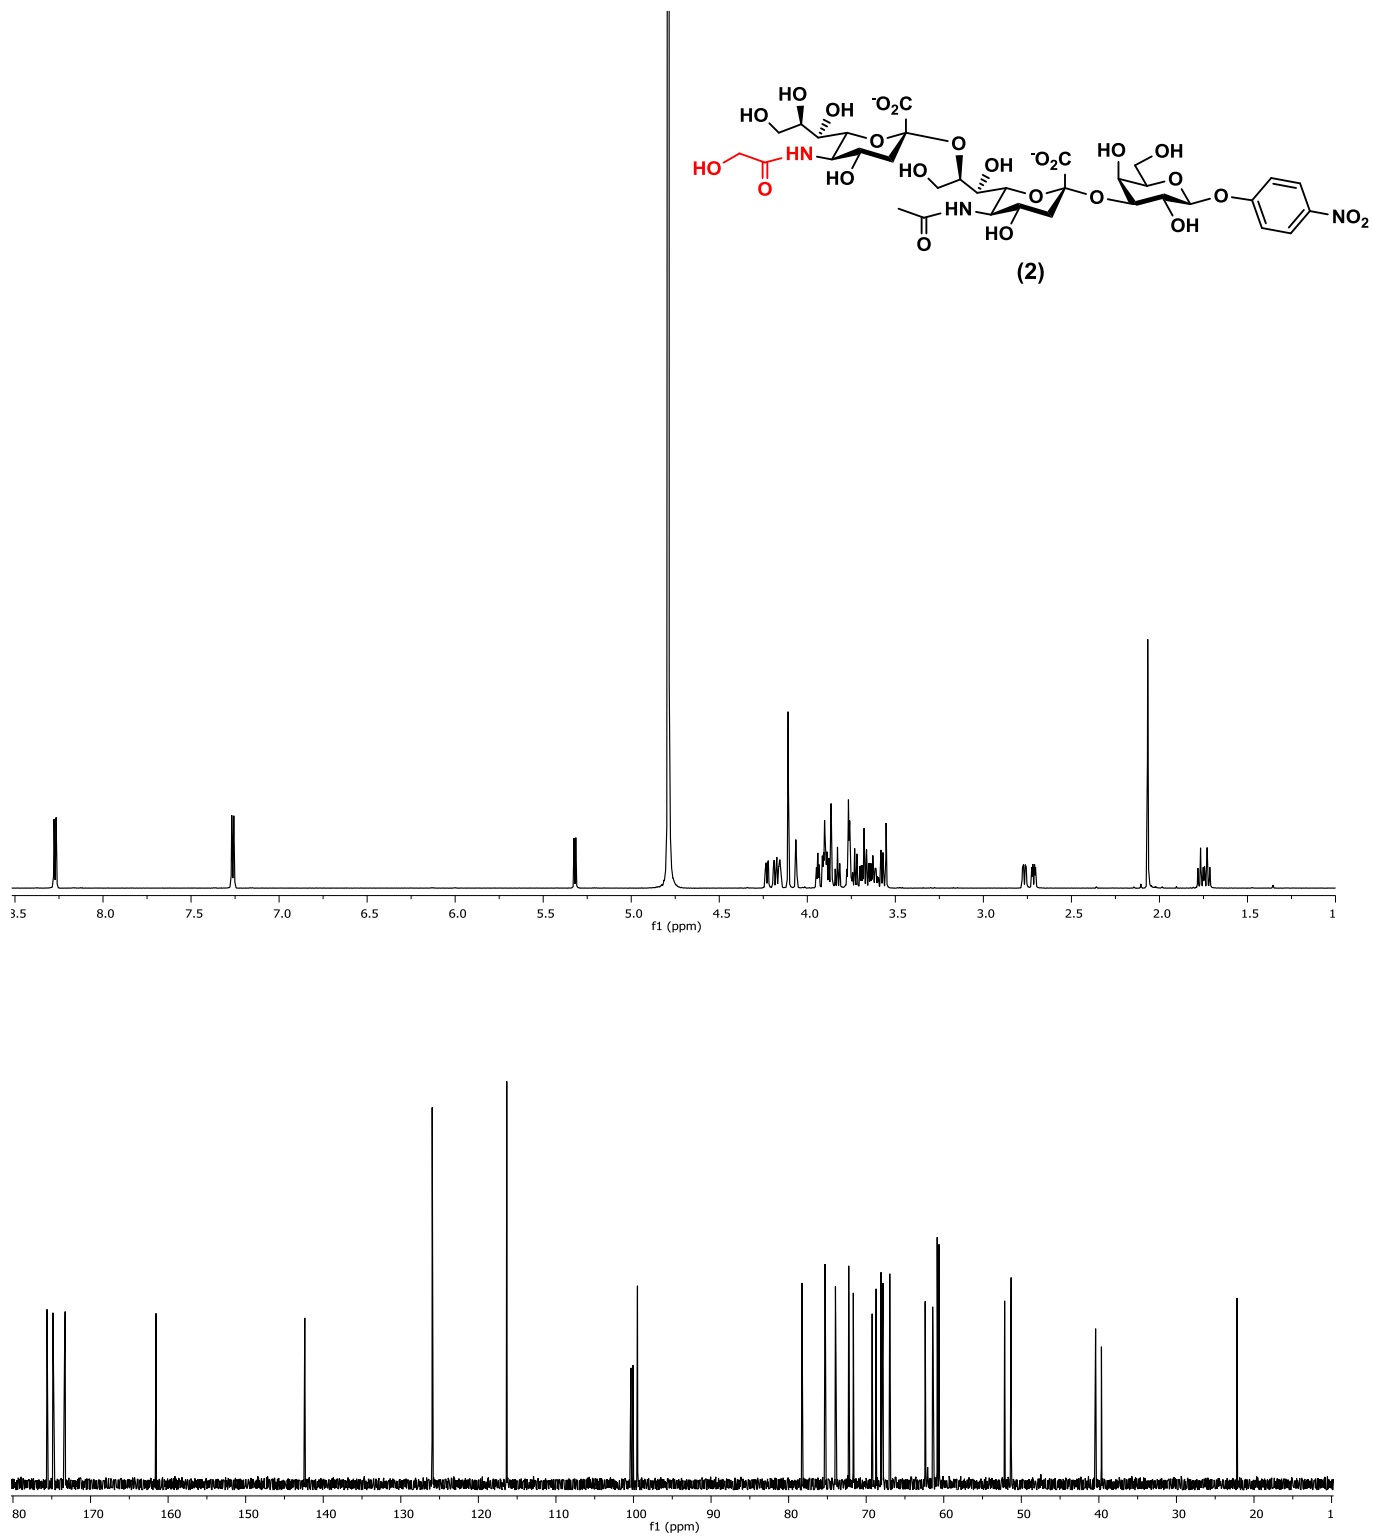

$^1\text{H}$  and  $^{13}\text{C}$  NMR spectra of Neu5Az $\alpha$ 2–8Neu5Ac $\alpha$ 2–3Gal $\beta$ pNP (3)

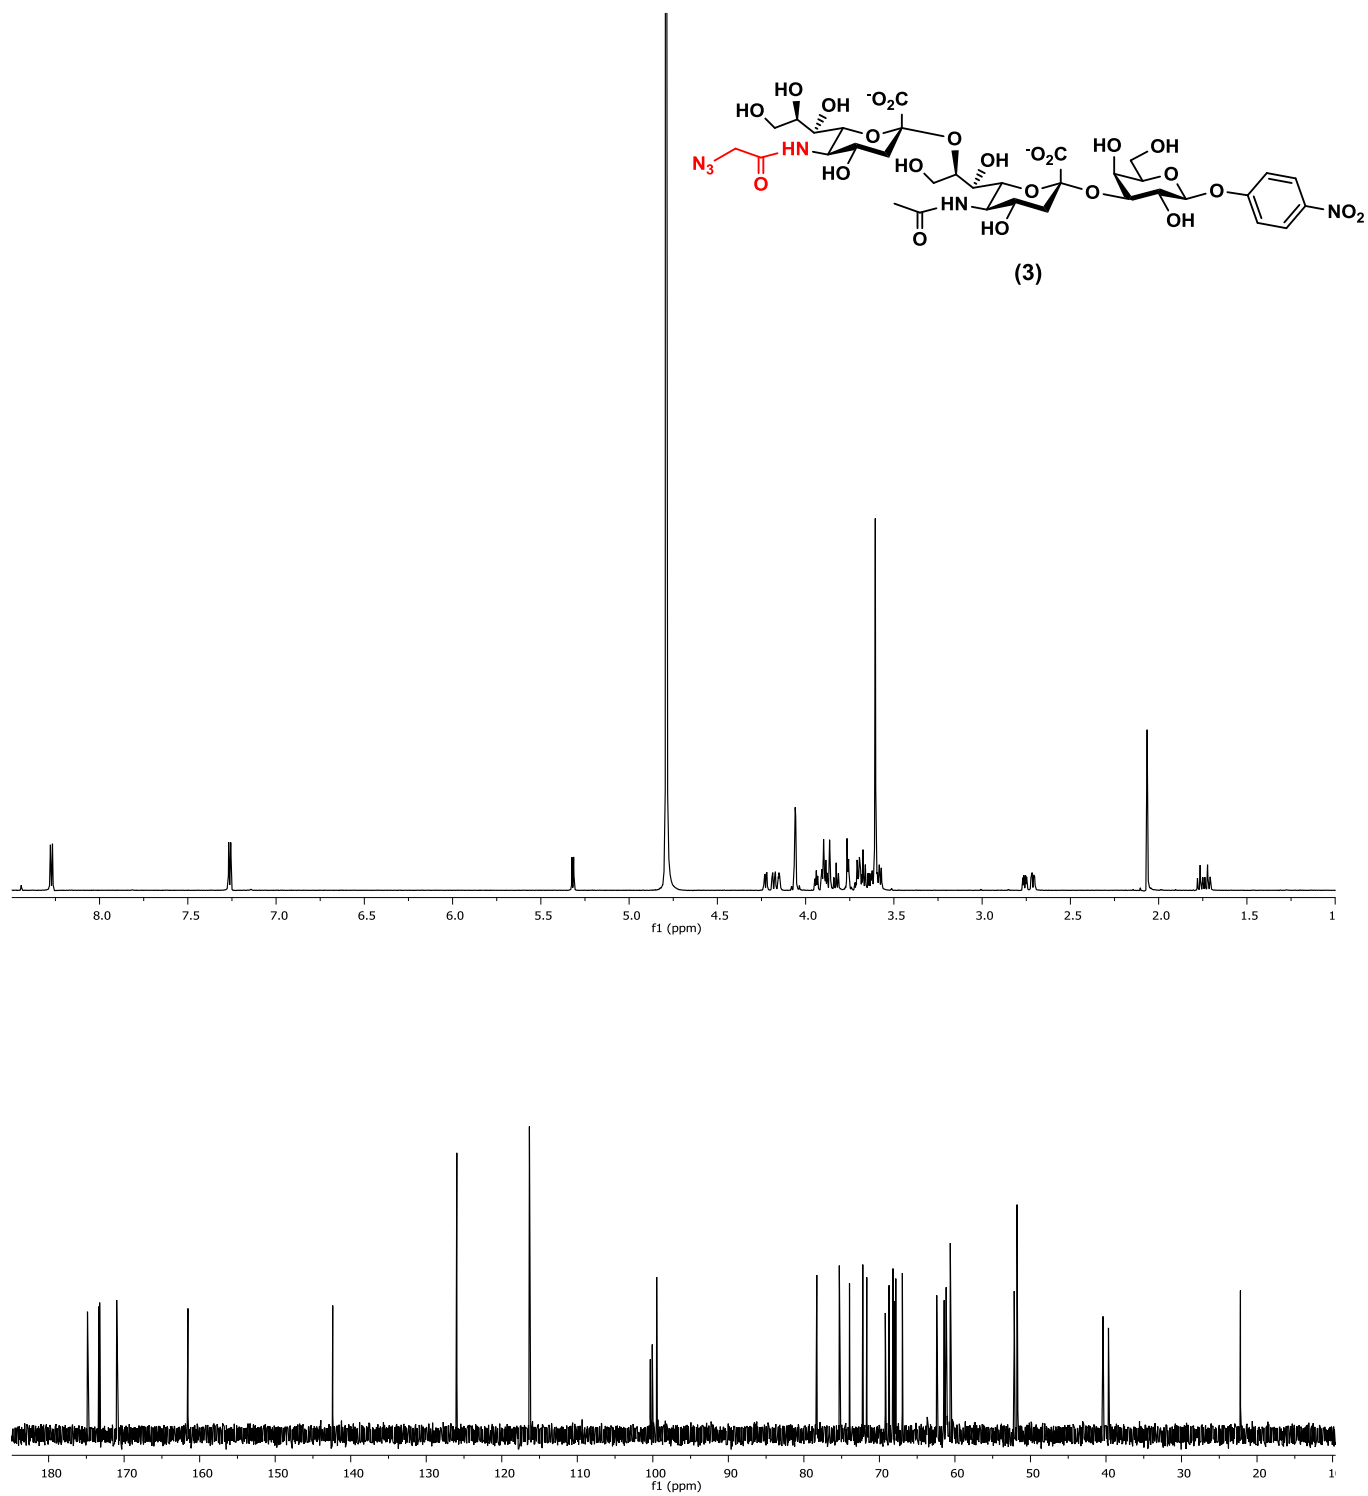

$^1\text{H}$  and  $^{13}\text{C}$  NMR spectra of Kdn $\alpha$ 2-8Neu5Ac $\alpha$ 2-3Gal $\beta$ pNP (4)

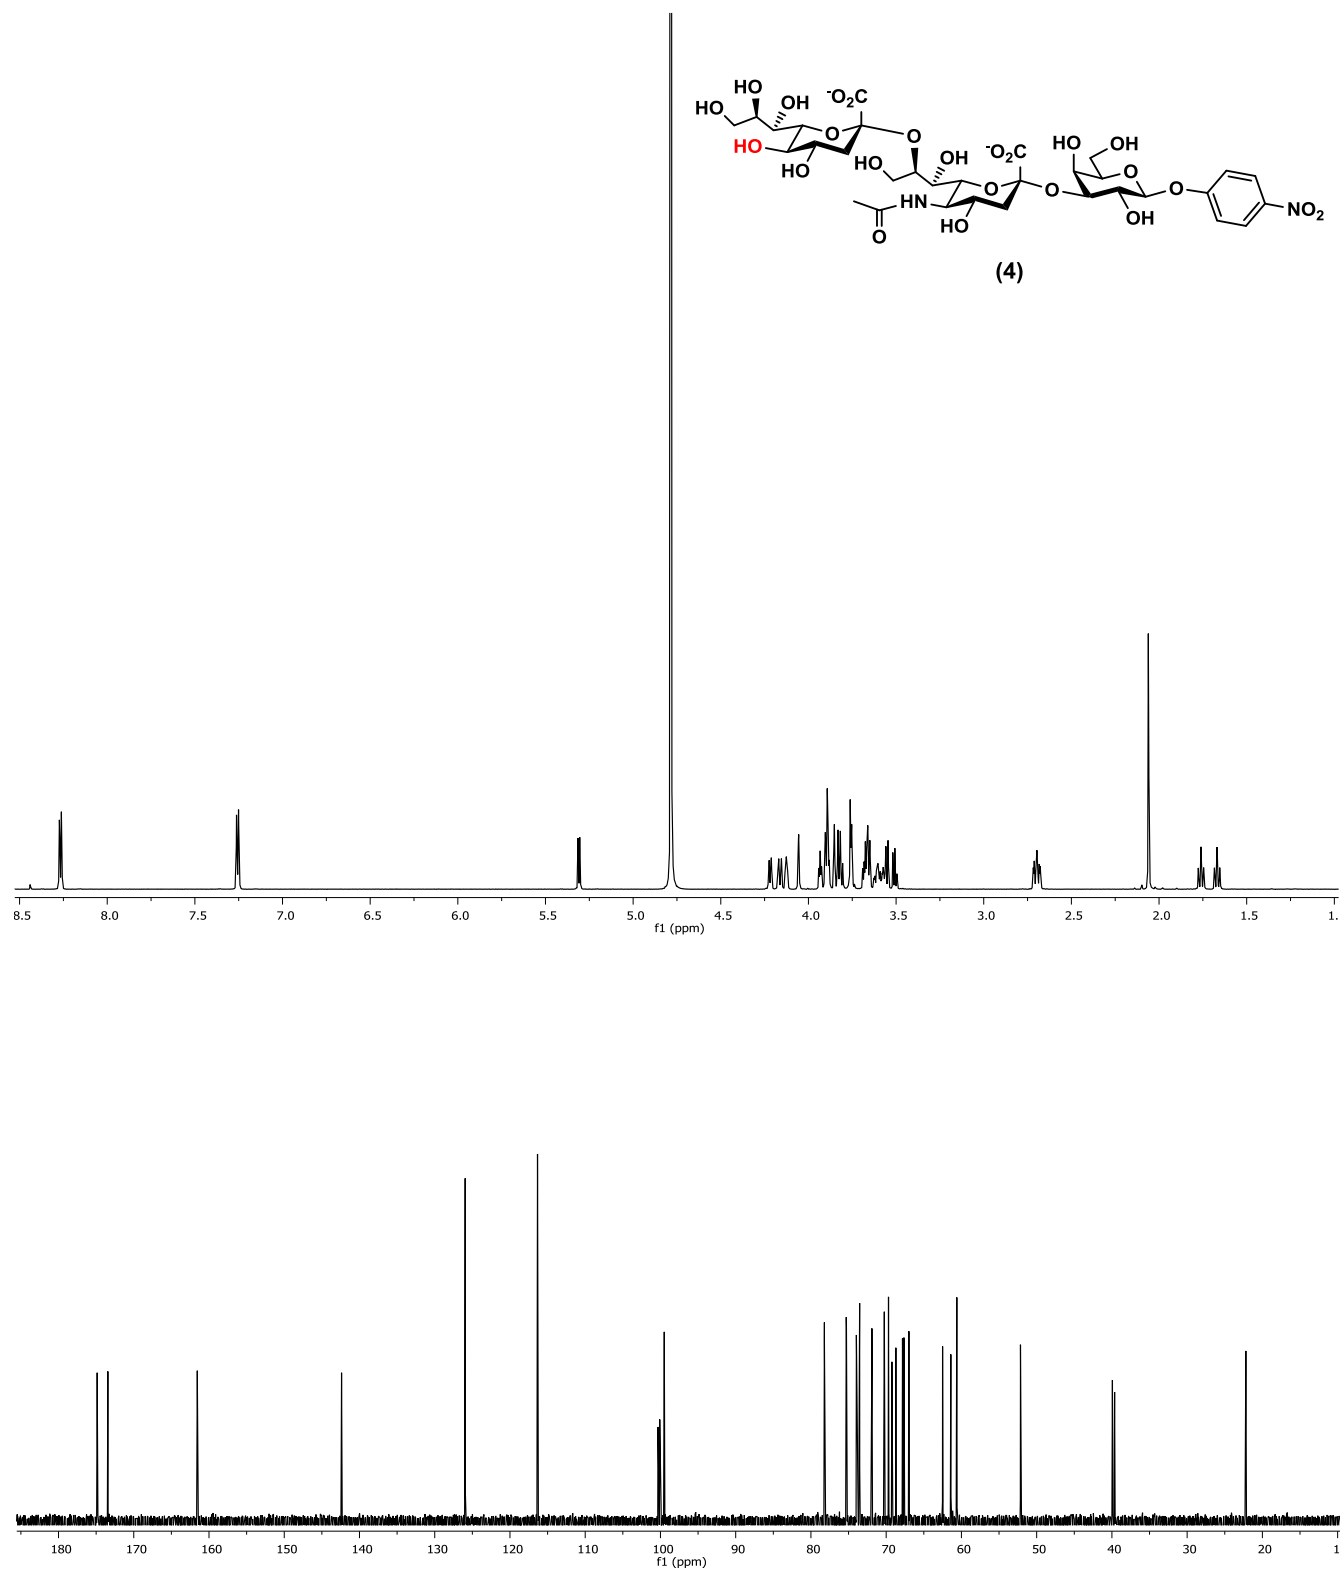

$^1\text{H}$  and  $^{13}\text{C}$  NMR spectra of Neu5N<sub>3</sub>α2-8Neu5Acα2-3GalβpNP (5)

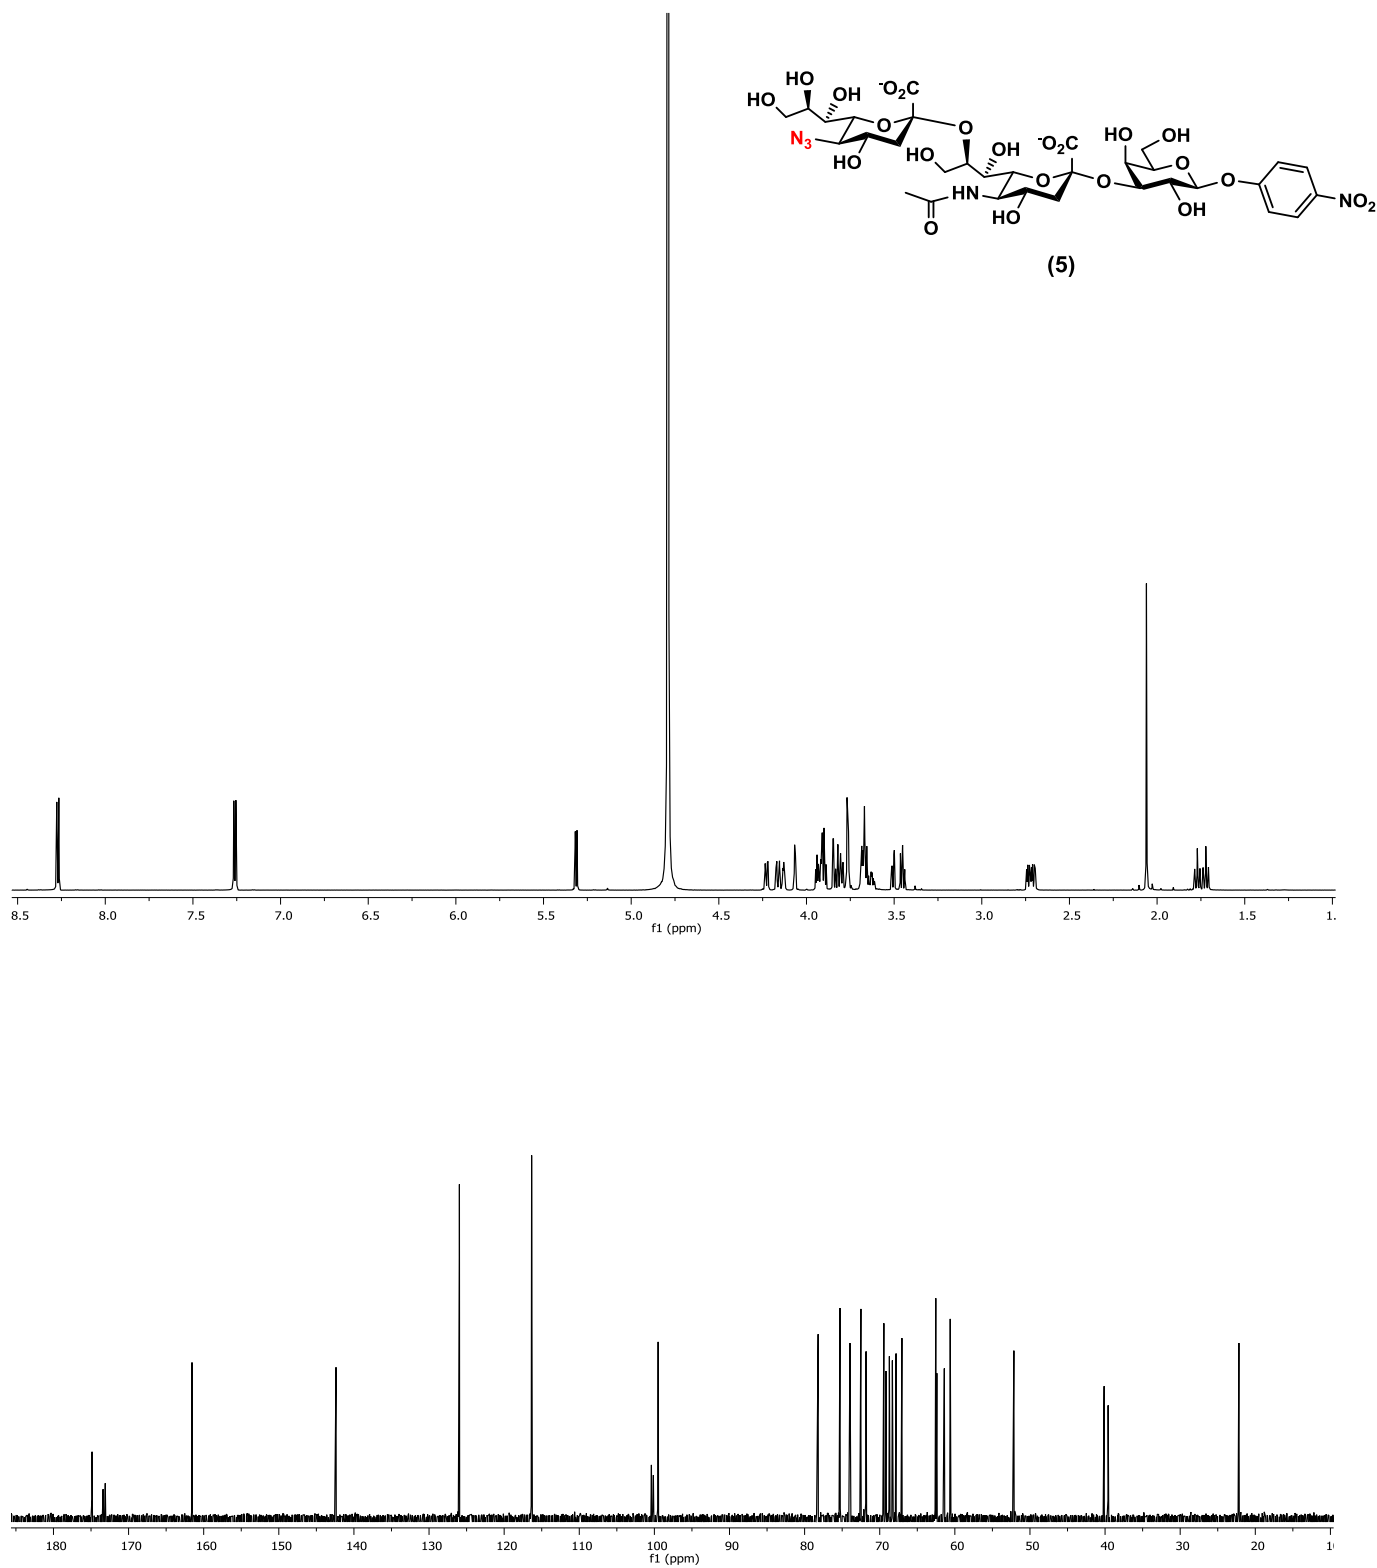

$^1\text{H}$  and  $^{13}\text{C}$  NMR spectra of Neu5Ac7N<sub>3</sub> $\alpha$ 2-8Neu5Ac $\alpha$ 2-3Gal $\beta$ pNP (6)

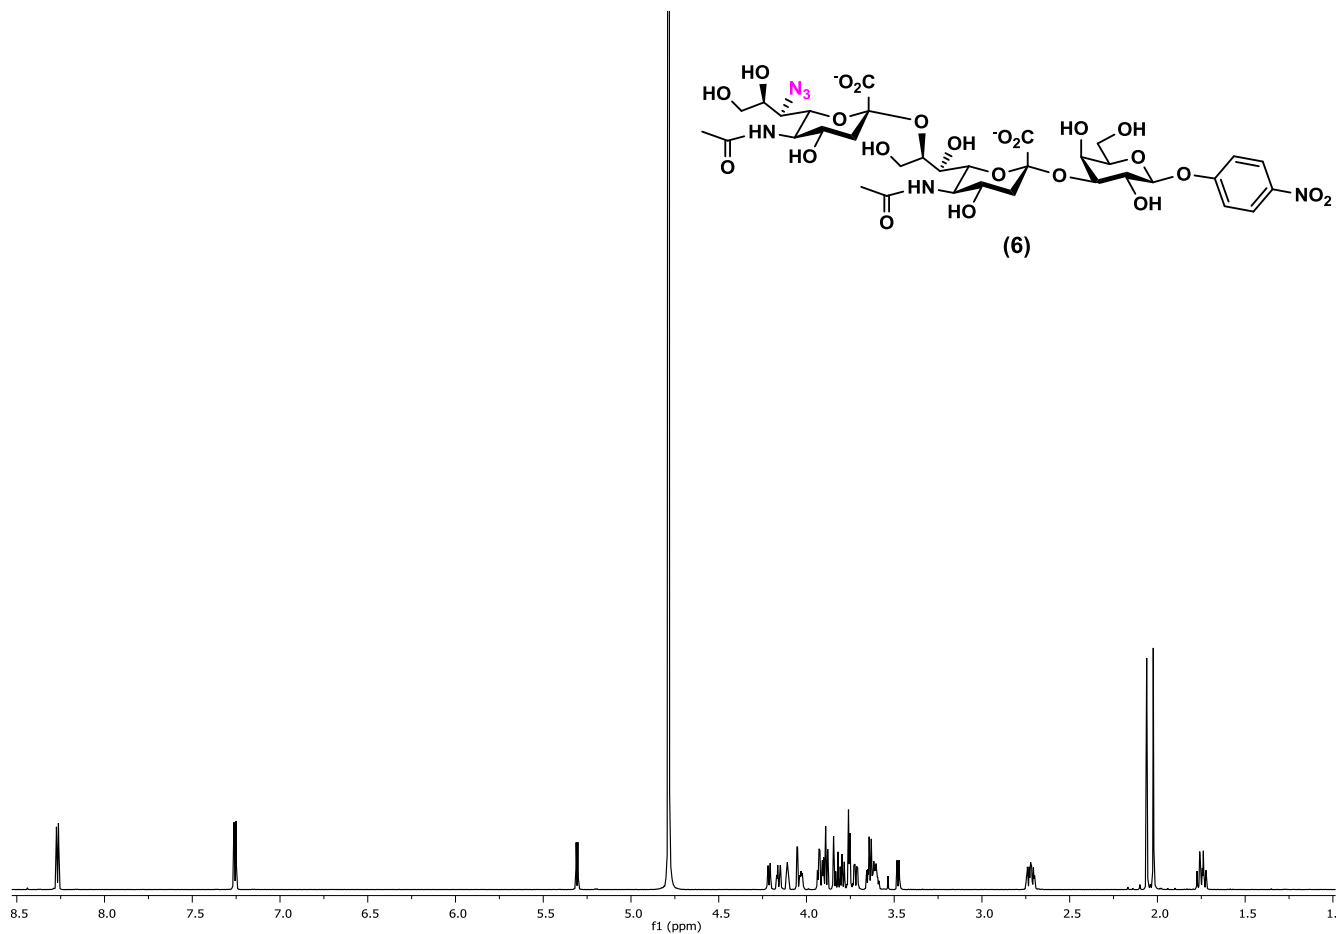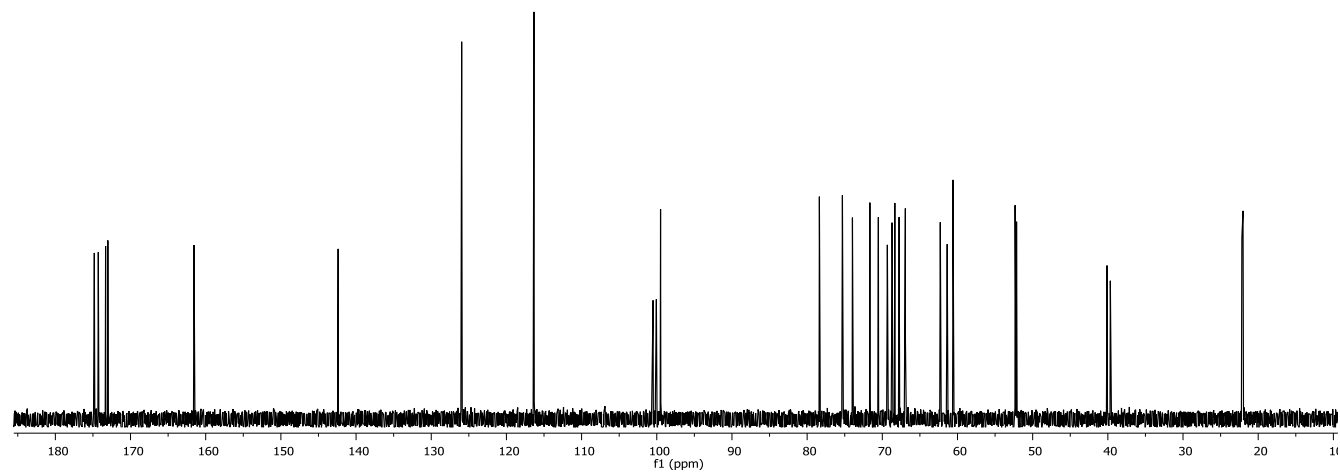

$^1\text{H}$  and  $^{13}\text{C}$  NMR spectra of Neu5Ac9N<sub>3</sub> $\alpha$ 2-8Neu5Ac $\alpha$ 2-3Gal $\beta$ pNP (7)

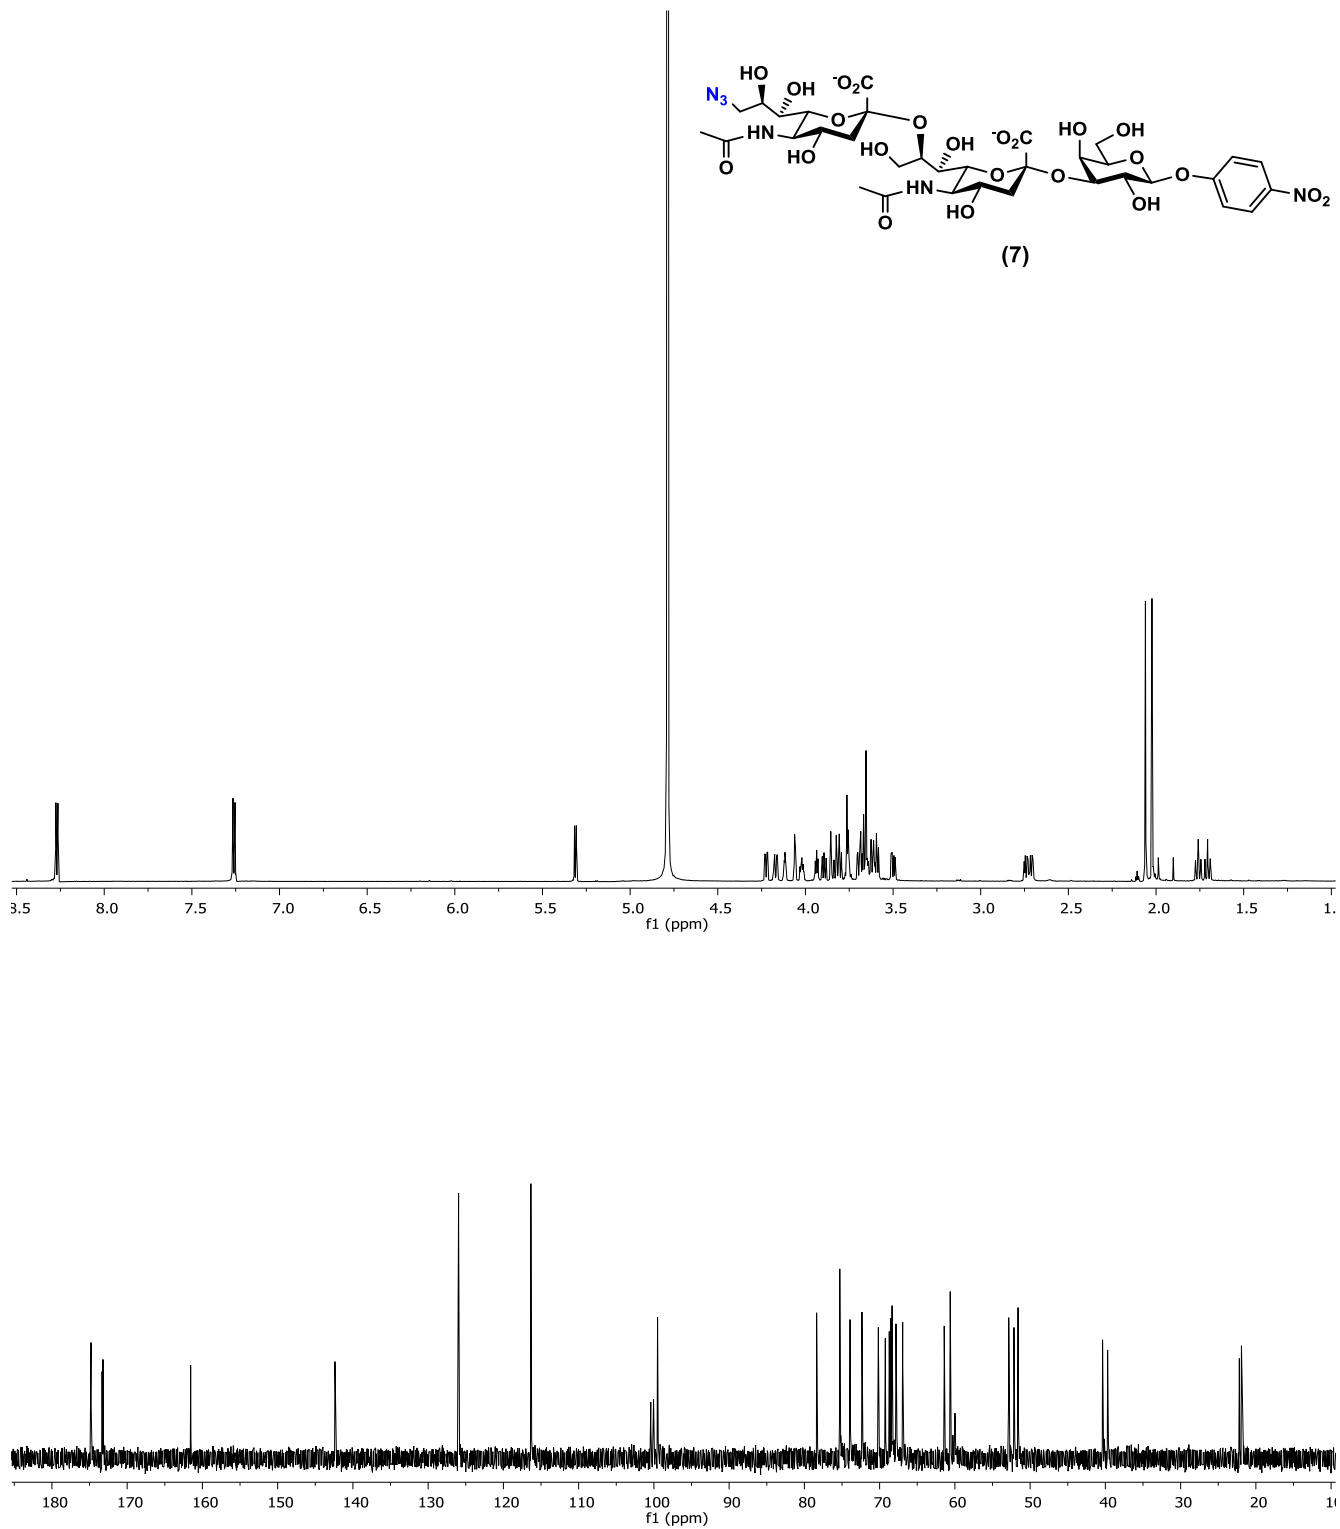

Supplement: c6ob02240e1.pdf [file c6ob02240e1.pdf]
